# Supplementary material for: An interphase actin wave promotes mitochondrial content mixing and organelle homeostasis
Source: PubMed Central journal article supplement (PMC11076292; doi:10.1038/s41467-024-48189-1), 2024-05-07
Supplement: 41467_2024_48189_MOESM3_ESM.pdf [file 41467_2024_48189_MOESM3_ESM.pdf]

## Description of Additional Supplementary Files

### **File name: Supplementary Movie 1**

**Description: Interphase actin wave samples mitochondrial subpopulations promoting their fragmentation.** Video of interphase HeLa cell where actin is marked with Lifeact-GFP (green) and mitochondria are marked with mito-DsRed2 (magenta). Arrow indicates the position of the actin wave. Time = min:sec.

### **File name: Supplementary Movie 2**

**Description: CDK1 activation increases speed of interphase actin wave.** Video of HeLa cells in interphase where actin is marked with Lifeact-GFP, after addition of DMSO or the WEE1 inhibitor Adavosertib (300nM for ~4hrs). Arrows indicate the positions of the actin waves. Time = min:sec. Display scaling between the two conditions is not equal for ease of viewing.

### **File name: Supplementary Movie 3**

**Description: GCaMP6s signal is not correlated with the interphase actin wave.** Video of interphase HeLa cell expressing the calcium indicator GCaMP6s and the actin marker Lifeact-miRFP. Arrow indicates the position of the actin wave. Time = min:sec.

### **File name: Supplementary Movie 4**

**Description: The actin wave persists after mitochondrial depolarization.** Video of interphase HeLa cells where actin is marked with Lifeact-GFP, both without drug addition and after 20 $\mu$ M CCCP for >30 minutes. Arrows indicate the positions of the actin waves. Time = min:sec.

### **File name: Supplementary Movie 5**

**Description: Interphase actin wave-associated mitochondrial actin comet tails form after microtubule depolymerization.** Video of interphase HeLa cell treated with 10 $\mu$ M nocodazole for 1hr, where actin is marked with Lifeact-GFP and mitochondria are marked with mito-DsRed2. Arrow indicates the leading edge of an actin wave-associated mitochondria with a trailing actin comet tail. Time = min:sec.
